# Supplementary material for: Probing the Metabolic Landscape of Plant Vascular Bundles by Infrared Fingerprint Analysis, Imaging and Mass Spectrometry
Source: Biomolecules. 2021 Nov 18;11(11):1717. doi: 10.3390/biom11111717 (PMC8615794; doi:10.3390/biom11111717)
Supplement: Supplementary file 1 [file biomolecules-11-01717-s001.zip]

Archive with 5 entries (5 files):
- Supplemental Fig 1_3.pdf
- SupplTableS1.xlsx
- SupplTableS2.xlsx
- SupplTableS3.xlsx
- SupplTableS4.xlsx
