# Supplementary material for: Probing the Metabolic Landscape of Plant Vascular Bundles by Infrared Fingerprint Analysis, Imaging and Mass Spectrometry
Source: Biomolecules. 2021 Nov 18;11(11):1717. doi: 10.3390/biom11111717 (PMC8615794; doi:10.3390/biom11111717)
Supplement: Supplementary file 1 [file biomolecules-11-01717-s001.zip › SupplTableS1.xlsx]

## Sheet: Suppl. Table S1
Suppl. Table 1. : Overview of spectral library components and derived image variables. The table lists represents all library spectra available for the computation of sap spectra and tissue images additional to derived PCA sap components. Below the main components of interest for imaging using the standard library are listed.
Short ID	Compound Name	Group 1	Group 2	Group 3	Chem ID	Source	Variable Type	Image Region	model bounds
MMI	MMI membrane	internal standard	PET	-	GT 1000R	IPK	chemical Fingerprint	none Tissue/all	non-negativity
MMI	MMI membrane	internal standard	PET	-	GT 1000R	IPK	chemical Fingerprint	none Tissue/all	non-negativity
ABA	abscisic acid	Metab	hormones	ABA	[ABA]	IPK	chemical Fingerprint	biological Tissue	non-negativity
ABA-Glu	abscisic acid beta-D-glucosyl-ester	Metab	hormones	ABA	[ABA_b1_Glc]	IPK	chemical Fingerprint	biological Tissue	non-negativity
ACC	1-aminocyclopropane-1-carboxylic acid	Metab	hormones	Ethylene	[ACC]	IPK	chemical Fingerprint	biological Tissue	non-negativity
Ala	Ala	AminoA	NaN	AminoA	[Ala]	IPK	chemical Fingerprint	biological Tissue	non-negativity
Ara	arabinose	carb	soluble sugar	pentose	[Ara]	INRA	chemical Fingerprint	biological Tissue	non-negativity
AscH2	ascorbic acid	Metab	endiol	reductone	[AscH2]	IPK	chemical Fingerprint	biological Tissue	non-negativity
Asn	Asn	AminoA	NaN	AminoA	[Asn]	IPK	chemical Fingerprint	biological Tissue	non-negativity
Asp	Asp	AminoA	NaN	AminoA	[Asp]	IPK	chemical Fingerprint	biological Tissue	non-negativity
CA	p-coumaric acid	Metab	aromatic	aromatic acid	[CA]	IPK	chemical Fingerprint	biological Tissue	non-negativity
CA	p-coumaric acid	Metab	aromatic	aromatic acid	[CA]	INRA	chemical Fingerprint	biological Tissue	non-negativity
CGA	chlorogenic acid	Metab	aromatic	aromatic acid	[CGA]	IPK	chemical Fingerprint	biological Tissue	non-negativity
Cys	Cys	AminoA	NaN	AminoA	[Cys]	IPK	chemical Fingerprint	biological Tissue	non-negativity
FA	t-ferulic acid	Metab	aromatic	aromatic acid	[FA]	IPK	chemical Fingerprint	biological Tissue	non-negativity
FA	t-ferulic acid	Metab	aromatic	aromatic acid	[FA]	INRA	chemical Fingerprint	biological Tissue	non-negativity
Fru	fructose	carb	soluble sugar	hexose	[Fru]	IPK	chemical Fingerprint	biological Tissue	non-negativity
Fru	fructose	carb	soluble sugar	hexose	[Fru]	IPK	chemical Fingerprint	biological Tissue	non-negativity
Fru	fructose	carb	soluble sugar	hexose	[Fru]	IPK	chemical Fingerprint	biological Tissue	non-negativity
Fru	fructose	carb	soluble sugar	hexose	[Fru]	IPK	chemical Fingerprint	biological Tissue	non-negativity
Fru	fructose	carb	soluble sugar	hexose	[Fru]	IPK	chemical Fingerprint	biological Tissue	non-negativity
Fru	fructose	carb	soluble sugar	hexose	[Fru]	IPK	chemical Fingerprint	biological Tissue	non-negativity
Fru	fructose	carb	soluble sugar	hexose	[Fru]	IPK	chemical Fingerprint	biological Tissue	non-negativity
Fru	fructose	carb	soluble sugar	hexose	[Fru]	IPK	chemical Fingerprint	biological Tissue	non-negativity
Fru	fructose	carb	soluble sugar	hexose	[Fru]	INRA	chemical Fingerprint	biological Tissue	non-negativity
G	guaiacyl rich	lignin	cell wall	polymer	[G]n	INRA	chemical Fingerprint	biological Tissue	non-negativity
GA3	gibberellic acid A3	Metab	hormones	Gibberellins	[GA3]	IPK	chemical Fingerprint	biological Tissue	non-negativity
GA3	gibberellic acid A3	Metab	hormones	Gibberellins	[GA3]	IPK	chemical Fingerprint	biological Tissue	non-negativity
GA3	gibberellic acid A3	Metab	hormones	Gibberellins	[GA3]	IPK	chemical Fingerprint	biological Tissue	non-negativity
GA3	gibberellic acid A3	Metab	hormones	Gibberellins	[GA3]	IPK	chemical Fingerprint	biological Tissue	non-negativity
Gal	galactose	carb	soluble sugar	hexose	[Gal]	INRA	chemical Fingerprint	biological Tissue	non-negativity
GalA	galacturonic acid	carb	soluble sugar	hexonic acid	[GalA]	INRA	chemical Fingerprint	biological Tissue	non-negativity
Glc	glucose	carb	soluble sugar	hexose	[Glc]	IPK	chemical Fingerprint	biological Tissue	non-negativity
Glc	glucose	carb	soluble sugar	hexose	[Glc]	IPK	chemical Fingerprint	biological Tissue	non-negativity
Glc	glucose	carb	soluble sugar	hexose	[Glc]	IPK	chemical Fingerprint	biological Tissue	non-negativity
Glc	glucose	carb	soluble sugar	hexose	[Glc]	IPK	chemical Fingerprint	biological Tissue	non-negativity
Glc	glucose	carb	soluble sugar	hexose	[Glc]	IPK	chemical Fingerprint	biological Tissue	non-negativity
Glc	glucose	carb	soluble sugar	hexose	[Glc]	IPK	chemical Fingerprint	biological Tissue	non-negativity
Glc	glucose	carb	soluble sugar	hexose	[Glc]	INRA	chemical Fingerprint	biological Tissue	non-negativity
GlcUA	glucuronic acid	carb	soluble sugar	hexonic acid	[GlcUA]	IPK	chemical Fingerprint	biological Tissue	non-negativity
Gln	Gln	AminoA	NaN	AminoA	[Gln]	IPK	chemical Fingerprint	biological Tissue	non-negativity
H	p-hydroxyphenyl rich	lignin	cell wall	polymer	[H]n	INRA	chemical Fingerprint	biological Tissue	non-negativity
IAA	indole-3-acetic acid	Metab	hormones	IAA	[IAA]	IPK	chemical Fingerprint	biological Tissue	non-negativity
IAA-Me	indole-3-acetic acid methyl ester	Metab	hormones	IAA	[IAA-Me]	IPK	chemical Fingerprint	biological Tissue	non-negativity
JA	jasmonic acid	Metab	hormones	Jasmonates	[JA]	IPK	chemical Fingerprint	biological Tissue	non-negativity
Canola	Canola	Lipids	Lipids	Lipids	[Canola]	IPK	chemical Fingerprint	biological Tissue	non-negativity
Corn	Corn	Lipids	Lipids	Lipids	[Corn]	IPK	chemical Fingerprint	biological Tissue	non-negativity
Cottonseed	Cottonseed	Lipids	Lipids	Lipids	[Cottonseed]	IPK	chemical Fingerprint	biological Tissue	non-negativity
Linseed	Linseed	Lipids	Lipids	Lipids	[Linseed]	IPK	chemical Fingerprint	biological Tissue	non-negativity
Peanut	Peanut	Lipids	Lipids	Lipids	[Peanut]	IPK	chemical Fingerprint	biological Tissue	non-negativity
Olive	Olive	Lipids	Lipids	Lipids	[Olive]	IPK	chemical Fingerprint	biological Tissue	non-negativity
Safflower	Safflower	Lipids	Lipids	Lipids	[Safflower]	IPK	chemical Fingerprint	biological Tissue	non-negativity
Olive	Olive	Lipids	Lipids	Lipids	[Olive]	IPK	chemical Fingerprint	biological Tissue	non-negativity
Sunflower	Sunflower	Lipids	Lipids	Lipids	[Sunflower]	IPK	chemical Fingerprint	biological Tissue	non-negativity
Mal	maltose	carb	soluble sugar	dimer	[Glc_a14_Glc]	IPK	chemical Fingerprint	biological Tissue	non-negativity
Mal	maltose	carb	soluble sugar	dimer	[Glc_a14_Glc]	INRA	chemical Fingerprint	biological Tissue	non-negativity
Man	mannose	carb	soluble sugar	hexose	[Man]	IPK	chemical Fingerprint	biological Tissue	non-negativity
Man	mannose	carb	soluble sugar	hexose	[Man]	IPK	chemical Fingerprint	biological Tissue	non-negativity
Man	mannose	carb	soluble sugar	hexose	[Man]	INRA	chemical Fingerprint	biological Tissue	non-negativity
Mel	melibiose	carb	soluble sugar	dimer	[Gal_a16_Glc]	INRA	chemical Fingerprint	biological Tissue	non-negativity
OCT	optimal cutting temperature	embedding material	OCT	matrix	[OCT]	IPK	chemical Fingerprint	none Tissue/embedding matrix	non-negativity
OHG	5-hydroxyguaiacyl rich	lignin	cell wall	polymer	[OHG]n	INRA	chemical Fingerprint	biological Tissue	non-negativity
Ox-IAA	2-ox-indole-3-acetic acid	Metab	hormones	IAA	[2Ox-IAA]	IPK	chemical Fingerprint	biological Tissue	non-negativity
PEP	phosphoenol pyruvate	Metab	enol	enol	[PEP]	IPK	chemical Fingerprint	biological Tissue	non-negativity
PGA	3-phosphoglyceric acid	Metab	glycerates	glycerates	[3PG]	IPK	chemical Fingerprint	biological Tissue	non-negativity
Phe	Phe	AminoA	NaN	AminoA	[Phe]	IPK	chemical Fingerprint	biological Tissue	non-negativity
Amyloglucosidase	Amyloglucosidase	Protein	Protein00	polymer	Amyloglucosidase	IPK	chemical Fingerprint	biological Tissue	non-negativity
Glucuronidase	Glucuronidase	Protein	Protein01	polymer	[Glucuronidase]n	IPK	chemical Fingerprint	biological Tissue	non-negativity
Invertase	Invertase	Protein	Protein01	polymer	[Invertase]n	IPK	chemical Fingerprint	biological Tissue	non-negativity
BSA	BSA	Protein	Protein02	polymer	[BSA]n	IPK	chemical Fingerprint	biological Tissue	non-negativity
Protease	Protease	Protein	Protein02	polymer	[Protease]n	IPK	chemical Fingerprint	biological Tissue	non-negativity
RNAse	RNAse	Protein	Protein02	polymer	[RNAse]n	IPK	chemical Fingerprint	biological Tissue	non-negativity
Raf	raffinose	carb	soluble sugar	oligomer	[Gal_a16_Glc_a12_Fru]	IPK	chemical Fingerprint	biological Tissue	non-negativity
Raf	raffinose	carb	soluble sugar	oligomer	[Gal_a16_Glc_a12_Fru]	IPK	chemical Fingerprint	biological Tissue	non-negativity
Raf	raffinose	carb	soluble sugar	oligomer	[Gal_a16_Glc_a12_Fru]	IPK	chemical Fingerprint	biological Tissue	non-negativity
Raf	raffinose	carb	soluble sugar	oligomer	[Gal_a16_Glc_a12_Fru]	IPK	chemical Fingerprint	biological Tissue	non-negativity
Raf	raffinose	carb	soluble sugar	oligomer	[Gal_a16_Glc_a12_Fru]	IPK	chemical Fingerprint	biological Tissue	non-negativity
Raf	raffinose	carb	soluble sugar	oligomer	[Gal_a16_Glc_a12_Fru]	IPK	chemical Fingerprint	biological Tissue	non-negativity
Rib	ribose	carb	soluble sugar	pentose	[Rib]	INRA	chemical Fingerprint	biological Tissue	non-negativity
S	sinapyl rich	lignin	cell wall	polymer	[S]n	INRA	chemical Fingerprint	biological Tissue	non-negativity
Sor	sorbose	carb	soluble sugar	hexose	[Sor]	INRA	chemical Fingerprint	biological Tissue	non-negativity
Suc	sucrose	carb	soluble sugar	dimer	[Glc_ab12_Fru]	IPK	chemical Fingerprint	biological Tissue	non-negativity
Suc	sucrose	carb	soluble sugar	dimer	[Glc_ab12_Fru]	IPK	chemical Fingerprint	biological Tissue	non-negativity
Suc	sucrose	carb	soluble sugar	dimer	[Glc_ab12_Fru]	IPK	chemical Fingerprint	biological Tissue	non-negativity
Suc	sucrose	carb	soluble sugar	dimer	[Glc_ab12_Fru]	IPK	chemical Fingerprint	biological Tissue	non-negativity
Suc	sucrose	carb	soluble sugar	dimer	[Glc_ab12_Fru]	IPK	chemical Fingerprint	biological Tissue	non-negativity
Suc	sucrose	carb	soluble sugar	dimer	[Glc_ab12_Fru]	IPK	chemical Fingerprint	biological Tissue	non-negativity
Suc	sucrose	carb	soluble sugar	dimer	[Glc_ab12_Fru]	IPK	chemical Fingerprint	biological Tissue	non-negativity
Suc	sucrose	carb	soluble sugar	dimer	[Glc_ab12_Fru]	INRA	chemical Fingerprint	biological Tissue	non-negativity
Tre	trehalose	carb	soluble sugar	dimer	[Glc_a11_Glc]	INRA	chemical Fingerprint	biological Tissue	non-negativity
VA	vanillic acid	Metab	aromatic	aromatic acid	[VA]	IPK	chemical Fingerprint	biological Tissue	non-negativity
Xyl	xylose	carb	soluble sugar	pentose	[Xyl]	INRA	chemical Fingerprint	biological Tissue	non-negativity
caffeine	caffeine	Metab	alkaloids	xanthine	[caffeine]	IPK	chemical Fingerprint	biological Tissue	non-negativity
h2o	water	water	liquid	matrix	[h2o]	IPK	chemical Fingerprint	biological Tissue	-
h2o	water	water	liquid	matrix	[h2o]	IPK	chemical Fingerprint	biological Tissue	-
iPMP	N6-isopentenyl-adenosine-5-monophosphate	Metab	hormones	Cytokinins	[iPMP]	IPK	chemical Fingerprint	biological Tissue	non-negativity
iPR	N6-isopentenyl-adenosine	Metab	hormones	Cytokinins	[iPR]	IPK	chemical Fingerprint	biological Tissue	non-negativity
p_Ara	arabinan	carb	cell wall	polymer	[Ara_a15_Ara_a15_Ara/a13_Ara]n	INRA	chemical Fingerprint	biological Tissue	non-negativity
p_AraGal	arabinogalactan	carb	cell wall	polymer	([b15_Gal]x[b16_Gal]/[a13_Ara]x[a15_Ara]x[b12_Ara])n	IPK	chemical Fingerprint	biological Tissue	non-negativity
p_AraXyl	arabinoxylan	carb	cell wall	polymer	[b14_Xyl/a13_Ara]n	IPK	chemical Fingerprint	biological Tissue	non-negativity
p_AraXyl	arabinoxylan	carb	cell wall	polymer	[b14_Xyl/a13_Ara]n	IPK	chemical Fingerprint	biological Tissue	non-negativity
p_AraXyl	arabinoxylan	carb	cell wall	polymer	[b14_Xyl/a13_Ara]n	INRA	chemical Fingerprint	biological Tissue	non-negativity
p_BetaGlc	betaglucan	carb	cell wall	polymer	[b13_Glc/b14_Glc]n	INRA	chemical Fingerprint	biological Tissue	non-negativity
p_Cel	cellulose	carb	cell wall	polymer	[Glc_b14_Glc]n	IPK	chemical Fingerprint	biological Tissue	non-negativity
p_Cel	cellulose	carb	cell wall	polymer	[Glc_b14_Glc]n	INRA	chemical Fingerprint	biological Tissue	non-negativity
p_Gal	galactan	carb	cell wall	polymer	[a14_Gal]x[b13_Gal]n	INRA	chemical Fingerprint	biological Tissue	non-negativity
p_GalARha	pectin	carb	cell wall	polymer	[a14_GalA/b13_Xyl/b14/Gal]x[a12_Rha]n	INRA	chemical Fingerprint	biological Tissue	non-negativity
p_GalARha	rhamnogalacturonan	carb	cell wall	polymer	[a14_GalA/b13_Xyl/b14_Gal/a13_Ara/a12_Ara]x[a12_Rha]n	INRA	chemical Fingerprint	biological Tissue	non-negativity
p_GalMan	galactomannan	carb	cell wall	polymer	[Man_b14_Man/a61_Gal]	IPK	chemical Fingerprint	biological Tissue	non-negativity
p_GalMan	galactomannan	carb	cell wall	polymer	[Man_b14_Man/a61_Gal]	IPK	chemical Fingerprint	biological Tissue	non-negativity
p_GalMan	galactomannan	carb	cell wall	polymer	[Man_b14_Man/a61_Gal]	IPK	chemical Fingerprint	biological Tissue	non-negativity
p_GalMan	galactomannan	carb	cell wall	polymer	[Man_b14_Man/a61_Gal]	IPK	chemical Fingerprint	biological Tissue	non-negativity
p_GalMan	galactomannan	carb	cell wall	polymer	[Man_b14_Man/a61_Gal]	IPK	chemical Fingerprint	biological Tissue	non-negativity
p_Glc	amylose	carb	starch	polymer	[a14_Glc]n	IPK	chemical Fingerprint	biological Tissue	non-negativity
p_Glc	amylopectin	carb	starch	polymer	[a14_Glc/a16_Glc]n	IPK	chemical Fingerprint	biological Tissue	non-negativity
p_GlcUAXyl	glucuronoxylan	carb	cell wall	polymer	[b14_Xyl/(a12_GlcUA/a13_GlcUA)]n	INRA	chemical Fingerprint	biological Tissue	non-negativity
p_Man	mannan	carb	cell wall	polymer	[b14_Man]n	INRA	chemical Fingerprint	biological Tissue	non-negativity
tZ	trans-zeatin	Metab	hormones	Cytokinins	[tZ]	IPK	chemical Fingerprint	biological Tissue	non-negativity
tZMP	9-beta-D-ribosyl-trans-zeatin 5-monophosphate	Metab	hormones	Cytokinins	[tZMP]	IPK	chemical Fingerprint	biological Tissue	non-negativity
tZR	trans-zeatin-riboside	Metab	hormones	Cytokinins	[tZR]	IPK	chemical Fingerprint	biological Tissue	non-negativity
co2	CO2	experimnetal	vapor	mir	-	IPK	background noise	all regions	-
co2	CO2	experimnetal	vapor	mir	-	IPK	background noise	all regions	-
co2	CO2	experimnetal	vapor	mir	-	IPK	background noise	all regions	-
h2o	h2o vapor	experimnetal	vapor	near mir	-	NIST	background noise	all regions	-
h2o	h2o vapor	experimnetal	vapor	mid mir	-	NIST	background noise	all regions	-
h2o	h2o vapor	experimnetal	vapor	far mir	-	NIST	background noise	all regions	-
h2o	water	experimnetal	baseline	far mir	-	IPK	background noise	all regions	-
MMI	MMI membrane	experimnetal	baseline	-	GT 1000R	IPK	background noise	all regions	-
MMI	MMI membrane	experimnetal	baseline	-	GT 1000R	IPK	background noise	all regions	-
MieS	MieS average	Mie Scatter	-	-	-	-	scatter baseline	all regions	1
MieS PC1	scatter principal component 1	Mie Scatter	-	-	-	-	scatter baseline	all regions	-57:23
MieS PC2	scatter principal component 2	Mie Scatter	-	-	-	-	scatter baseline	all regions	-29:24
MieS PC3	scatter principal component 3	Mie Scatter	-	-	-	-	scatter baseline	all regions	-17:16
MieS PC4	scatter principal component 4	Mie Scatter	-	-	-	-	scatter baseline	all regions	-11:14
MieS PC5	scatter principal component 5	Mie Scatter	-	-	-	-	scatter baseline	all regions	-7:12
MieS PC6	scatter principal component 6	Mie Scatter	-	-	-	-	scatter baseline	all regions	-11:4
MieS PC7	scatter principal component 7	Mie Scatter	-	-	-	-	scatter baseline	all regions	-2:7
Short ID	EMSC result parameter	Group 1	Group 2	Group 3	Chem ID		Variable Type
off	offset	Level 0	offset		offset		residual
is	MMI	Level 0	MMI		GT 1000R		internal standard
AminoA	AminoA	level 1	AminoA		AminoA		sum
Lipids	Lipids	level 1	Lipids		Lipids		sum
Metab	Metab	level 1	Metab		Metab		sum
PEP	phosphoenol pyruvate	level 4	enol {Metab}		phosphoenol pyruvate		single
PGA	3-phosphoglyceric acid	level 4	glycerates {Metab}		3-phosphoglyceric acid		single
aromatic	aromatic	level 2	aromatic {Metab}		aromatic		sum
AscH2	ascorbic acid	level 4	endiol {Metab}		ascorbic acid		single
hormones	hormones	level 2	hormones {Metab}		hormones		sum
ABA	ABA	level 3	ABA {hormones}		ABA		sum
Cytokinins	Cytokinins	level 3	Cytokinins {hormones}		Cytokinins		sum
ACC	1-aminocyclopropane-1-carboxylic acid	level 4	Ethylene {hormones}		1-aminocyclopropane-1-carboxylic acid		single
Gibberellins	Gibberellins	level 3	Gibberellins {hormones}		Gibberellins		sum
IAA	IAA	level 3	IAA {hormones}		IAA		sum
JA	jasmonic acid	level 4	Jasmonates {hormones}		jasmonic acid		single
Protein	Protein	level 1	Protein		Protein		sum
carb	carb	level 1	carb		carb		sum
cell wall	cell wall	level 2	cell wall {carb}		cell wall		sum
soluble sugar	soluble sugar	level 2	soluble sugar {carb}		soluble sugar		sum
dimer	dimer	level 3	dimer {soluble sugar}		dimer		sum
Suc	sucrose	level 4	sucrose {dimer}		sucrose		single
hexonic acid	hexonic acid	level 3	hexonic acid {soluble sugar}		hexonic acid		sum
hexose	hexose	level 3	hexose {soluble sugar}		hexose		sum
oligomer	oligomer	level 3	oligomer {soluble sugar}		oligomer		sum
pentose	pentose	level 3	pentose {soluble sugar}		pentose		sum
starch	starch	level 2	starch {carb}		starch		sum
OCT	OCT	level 4	embedding material		OCT		single
lignin	lignin	level 1	lignin		lignin		sum
water	water	level 1	water		water		single
