# Supplementary material for: Probing the Metabolic Landscape of Plant Vascular Bundles by Infrared Fingerprint Analysis, Imaging and Mass Spectrometry
Source: Biomolecules. 2021 Nov 18;11(11):1717. doi: 10.3390/biom11111717 (PMC8615794; doi:10.3390/biom11111717)
Supplement: Supplementary file 1 [file biomolecules-11-01717-s001.zip › SupplTableS2.xlsx]

## Sheet: Suppl. Tbl. S2
Suppl. Table 2. Overview of normalized IR and MS scores.
		normalized av. sap component absorbance based on PCA															normalized IC-MS area scores
Sample ID	treatment	Sap 1	Sap 2	Sap 3	Sap 4	Sap 5	Sap 6	Sap 7	Sap 8	Sap 9	Sap 10	Sap 11	Sap 12	Sap 13	Sap 14	Sap 15	NADPH	2-Ureido-Gly	IAA	Pyridoxal 5-P	Allantoin	Allantoate	Trehalose 6-P	GMP	Taurine	Oxaloacetate	AMP	Mevalonic acid-5P	3-Deoxy-D-glycero-D-galacto-non-2-ulopyranosonate	2,5-Dihydroxybenzoate 2-O-?-D-glucoside	D-myo-Inositol 1,4-bisphosphate	UDP-Glucose	2-Aminoadipate	Pantothenate	Cysteic acid	PEP	NAc-glucosamine 1-P	Azelaic acid	N-Acetyl-?-neuraminate	Galactose 6-P	trans-Aconitate	NAc-Gly	2-Oxoglutaramate	Sinapinic acid	Levulinate	Uric acid	Erythrose 4-P	6-P-gluconate	UDP-NAc-glucosamine
3	control	0.912716	-0.437785	-0.0930587	-0.846199	0.266669	-0.531652	0.544451	-0.898683	-0.603101	-0.515431	-0.810889	-0.301256	3.35083	-0.60123	-0.836891	-0.749942	-0.894334	-0.822105	-1.03144	-0.763525	-0.880632	0.212788	-0.39271	0.411682	-0.984425	-0.676615	-0.760776	-1.29644	-1.12232	-0.354752	-0.475682	-1.17644	-1.19655	-0.863401	-0.922232	-1.08536	0.369066	1.13723	-0.0519968	-0.901345	-0.18053	-1.06077	-1.11739	-0.0812523	-1.37924	0.652308	0.0525937	-1.07948
3	control	-0.546094	-0.445901	0.0890572	-0.528963	-0.379672	-0.530383	0.497158	-0.155215	-0.601962	-0.619866	-0.813949	1.31658	1.87685	-0.759899	0.886579	-0.749942	-0.894334	-0.822105	-1.03144	-0.763525	-0.880632	0.212788	-0.39271	0.411682	-0.984425	-0.676615	-0.760776	-1.29644	-1.12232	-0.354752	-0.475682	-1.17644	-1.19655	-0.863401	-0.922232	-1.08536	0.369066	1.13723	-0.0519968	-0.901345	-0.18053	-1.06077	-1.11739	-0.0812523	-1.37924	0.652308	0.0525937	-1.07948
4	control	0.276091	-0.439211	0.836635	-0.925019	-0.39436	-0.105619	0.341415	0.704206	2.13912	-0.617514	-0.800859	-0.478882	-0.267527	-0.732353	0.860731	-0.98624	-0.865377	-0.746291	-0.898219	-0.639486	-0.846702	0.174839	-0.354083	0.151311	-0.626555	-0.83236	-0.421104	-1.08023	-1.09204	-0.792306	-0.570773	-0.887243	-1.27105	-0.729109	-0.929515	-0.857628	0.0069138	1.13622	-0.246781	-0.850502	-0.42624	-0.748835	-0.951989	-0.214036	-0.080183	-0.613432	-0.671815	-0.986207
4	control	1.57811	-0.444334	0.517205	-0.93182	-0.406972	0.850627	0.190687	0.0139855	1.67965	-0.619297	-0.813217	-0.429654	-0.213681	-0.748228	0.270602	-0.98624	-0.865377	-0.746291	-0.898219	-0.639486	-0.846702	0.174839	-0.354083	0.151311	-0.626555	-0.83236	-0.421104	-1.08023	-1.09204	-0.792306	-0.570773	-0.887243	-1.27105	-0.729109	-0.929515	-0.857628	0.0069138	1.13622	-0.246781	-0.850502	-0.42624	-0.748835	-0.951989	-0.214036	-0.080183	-0.613432	-0.671815	-0.986207
5	control	-0.547563	-0.446796	-0.56355	-0.567676	-0.411341	-0.531614	1.91438	-1.05365	2.06034	-0.620223	-0.14268	-0.583638	-0.565119	-0.758877	1.56472	-1.05277	-0.820322	-0.249132	-0.309376	-0.388404	-0.798048	1.41126	-0.327717	-0.426052	-0.0516687	-0.777418	0.844644	-0.832955	-0.47116	-0.60759	-0.461954	0.123112	-0.795788	0.777656	-0.882251	-0.257103	-0.133985	1.00251	-0.0612392	-0.618457	-0.402409	-0.088701	-0.221703	-0.812028	-0.499328	-0.604812	-0.225691	-0.673907
6	control	3.04148	-0.443427	-0.422941	0.555832	-0.275346	-0.503527	-0.791916	-1.05232	0.727394	-0.606983	1.86321	-0.456281	-0.565592	-0.75621	0.534509	-0.981295	-0.855577	-0.25547	-1.35619	-0.61878	-0.842417	-0.43751	-0.510989	-0.410962	-1.4303	-0.428895	-0.55491	-1.13656	-0.867922	-0.620038	-1.10371	-1.15217	-1.34882	-1.54996	-1.3068	-1.22649	0.503973	-1.42963	-0.78585	-1.09463	-1.38113	-1.31078	-1.30069	-0.351071	-0.76771	-0.0782399	-1.2277	-1.38431
6	control	-0.543987	-0.444086	0.00805784	2.54205	-0.401486	-0.529667	-0.827052	-1.05305	-0.597236	-0.618728	2.23286	-0.573287	-0.292464	-0.751338	-0.360942	-0.981295	-0.855577	-0.25547	-1.35619	-0.61878	-0.842417	-0.43751	-0.510989	-0.410962	-1.4303	-0.428895	-0.55491	-1.13656	-0.867922	-0.620038	-1.10371	-1.15217	-1.34882	-1.54996	-1.3068	-1.22649	0.503973	-1.42963	-0.78585	-1.09463	-1.38113	-1.31078	-1.30069	-0.351071	-0.76771	-0.0782399	-1.2277	-1.38431
7	control	-0.0394711	1.22414	-0.547209	0.790998	-0.177642	-0.283445	-0.810558	-0.611218	-0.566942	-0.608254	0.161257	2.14261	0.637662	-0.729514	0.877723	-0.815979	-0.623575	0.129379	0.00213886	2.92504	-0.700495	1.86531	-0.352198	-0.277491	1.93187	-0.558845	1.04222	0.1198	1.98787	-0.676404	-1.17787	0.354147	0.272875	1.22944	-0.974947	1.39605	1.92417	0.131281	0.974629	0.169209	-0.205721	1.04636	0.603424	-0.133547	0.718819	-0.0469708	-0.707219	-0.836648
7	control	-0.54748	-0.446644	-0.562519	1.47882	-0.412138	-0.531502	-0.829931	-1.05364	1.67904	-0.62015	-0.813103	-0.57086	0.712476	-0.759403	3.25784	-0.815979	-0.623575	0.129379	0.00213886	2.92504	-0.700495	1.86531	-0.352198	-0.277491	1.93187	-0.558845	1.04222	0.1198	1.98787	-0.676404	-1.17787	0.354147	0.272875	1.22944	-0.974947	1.39605	1.92417	0.131281	0.974629	0.169209	-0.205721	1.04636	0.603424	-0.133547	0.718819	-0.0469708	-0.707219	-0.836648
8	control	-0.547508	-0.446833	-0.47592	-0.935301	-0.412887	-0.532238	2.19232	-1.01106	0.711534	-0.620249	0.520133	-0.583003	0.151675	-0.760032	0.616811	0.639528	-0.662478	2.90864	1.51314	-0.52413	-0.609019	2.29541	-0.442126	-0.27672	0.851084	0.422176	-0.13883	1.38342	0.607732	-0.513967	-1.09957	0.898357	0.546242	1.07542	0.476395	1.08039	0.203073	0.274602	2.73234	1.31235	0.0321153	1.04688	1.81538	0.615957	0.382801	0.335776	-0.0552841	1.16442
8	control	-0.505711	-0.404928	-0.555155	-0.642499	-0.210114	-0.512321	-0.802541	-1.0509	-0.606796	2.89962	1.67174	1.44758	-0.22985	-0.735477	0.328598	0.639528	-0.662478	2.90864	1.51314	-0.52413	-0.609019	2.29541	-0.442126	-0.27672	0.851084	0.422176	-0.13883	1.38342	0.607732	-0.513967	-1.09957	0.898357	0.546242	1.07542	0.476395	1.08039	0.203073	0.274602	2.73234	1.31235	0.0321153	1.04688	1.81538	0.615957	0.382801	0.335776	-0.0552841	1.16442
9	shaded	0.977706	3.39121	-0.563285	-0.92629	0.0175867	-0.532085	-0.00715775	0.138207	-0.582861	0.833786	-0.577686	-0.503006	-0.492308	1.17027	-0.82645	1.42561	-0.489432	0.123428	-0.367403	-0.454451	-0.501112	-0.452221	1.65582	-0.300963	-0.0825631	0.946436	-0.43672	0.261899	1.78694	-0.16132	0.769223	0.0792222	0.844939	0.52885	0.458257	-0.316832	1.0547	-0.187673	-0.81371	1.70042	-0.437982	-0.25768	0.565647	1.3456	-0.682606	-0.00489223	0.268499	0.342791
9	shaded	-0.536116	2.35592	-0.563303	-0.934984	1.65523	-0.532152	-0.790267	2.14019	-0.614521	1.32796	-0.401512	-0.579366	-0.565732	3.46666	-0.877001	1.42561	-0.489432	0.123428	-0.367403	-0.454451	-0.501112	-0.452221	1.65582	-0.300963	-0.0825631	0.946436	-0.43672	0.261899	1.78694	-0.16132	0.769223	0.0792222	0.844939	0.52885	0.458257	-0.316832	1.0547	-0.187673	-0.81371	1.70042	-0.437982	-0.25768	0.565647	1.3456	-0.682606	-0.00489223	0.268499	0.342791
10	shaded	-0.412027	-0.121899	0.199957	-0.935028	4.09435	1.93384	1.20092	-0.110438	-0.560798	-0.60656	-0.659218	-0.580328	-0.565842	-0.606272	0.145268	1.97792	-0.31228	1.08163	1.02338	-0.467138	-0.320402	-0.412507	2.88578	-0.369187	-0.0126921	2.74879	-0.0986118	0.428439	0.175571	-0.0857259	1.70879	0.611593	1.10826	0.629247	1.24817	-0.079247	0.0341103	0.271447	-0.138766	0.915589	0.278469	0.290858	0.868683	-0.912919	0.442204	-0.504514	0.537373	1.24797
10	shaded	-0.536446	0.294522	-0.561359	-0.391676	1.85142	2.94508	-0.824469	0.8916	-0.606486	0.897446	-0.478727	-0.517702	-0.564305	-0.0444722	0.465918	1.97792	-0.31228	1.08163	1.02338	-0.467138	-0.320402	-0.412507	2.88578	-0.369187	-0.0126921	2.74879	-0.0986118	0.428439	0.175571	-0.0857259	1.70879	0.611593	1.10826	0.629247	1.24817	-0.079247	0.0341103	0.271447	-0.138766	0.915589	0.278469	0.290858	0.868683	-0.912919	0.442204	-0.504514	0.537373	1.24797
11	shaded	-0.541337	-0.446607	0.319538	-0.91064	-0.411362	1.10388	1.86607	-0.502689	0.743981	-0.62018	-0.813089	-0.568767	-0.565944	0.567779	-0.876994	0.383749	0.790166	-0.368917	-0.0607941	0.0470144	0.909698	-0.588451	-0.512866	-0.417764	1.25215	-0.0294502	1.57976	0.719956	-0.123838	-0.0109224	1.25047	0.652778	0.639291	-0.0324095	-0.00988041	0.305562	-1.02663	-0.781457	-0.245467	0.197783	0.223103	0.605661	0.565634	-0.74054	0.0758077	-0.513106	-0.0680033	0.724192
11	shaded	-0.54621	-0.446816	-0.563567	0.524104	-0.412656	-0.532241	-0.086341	-0.919676	-0.614608	2.0555	-0.644688	2.69202	-0.486277	-0.00249969	-0.877026	0.383749	0.790166	-0.368917	-0.0607941	0.0470144	0.909698	-0.588451	-0.512866	-0.417764	1.25215	-0.0294502	1.57976	0.719956	-0.123838	-0.0109224	1.25047	0.652778	0.639291	-0.0324095	-0.00988041	0.305562	-1.02663	-0.781457	-0.245467	0.197783	0.223103	0.605661	0.565634	-0.74054	0.0758077	-0.513106	-0.0680033	0.724192
12	shaded	2.63243	-0.443882	-0.0922057	1.17921	-0.412089	-0.531069	-0.817772	-0.49271	-0.614598	0.322257	-0.718703	2.06513	-0.565957	-0.759518	-0.877029	1.0909	0.812907	0.270011	0.486974	-0.0649338	0.779044	-0.66424	-0.13807	-0.415437	-0.0894466	-0.322995	0.479106	0.176958	0.015577	-0.0408394	-0.174187	0.245431	0.723514	0.233631	1.33782	0.18379	-0.211694	1.5808	1.03006	-0.242462	2.08107	-0.0370328	-0.0716976	1.91062	-0.0223407	2.18015	-0.218472	0.319555
12	shaded	-0.547384	-0.445634	-0.563542	1.60457	-0.411767	-0.532096	-0.829894	0.881486	-0.614589	1.17404	0.265487	-0.235446	-0.565919	0.639632	-0.877023	1.0909	0.812907	0.270011	0.486974	-0.0649338	0.779044	-0.66424	-0.13807	-0.415437	-0.0894466	-0.322995	0.479106	0.176958	0.015577	-0.0408394	-0.174187	0.245431	0.723514	0.233631	1.33782	0.18379	-0.211694	1.5808	1.03006	-0.242462	2.08107	-0.0370328	-0.0716976	1.91062	-0.0223407	2.18015	-0.218472	0.319555
13	shaded	0.51222	1.85783	0.608648	0.480587	-0.406882	-0.531406	-0.705767	1.40284	-0.614456	-0.564921	-0.450254	-0.576734	-0.565626	1.13474	-0.87685	0.361854	1.85599	-0.522783	0.763826	0.420578	1.96725	-0.640584	-0.381732	3.36205	0.0266301	-0.88257	0.1841	0.960143	0.292788	0.856992	0.71744	1.08989	0.853804	0.830392	1.29411	0.979075	0.504403	-0.728765	-0.465978	0.163149	0.631423	0.936501	0.54102	1.45264	1.88049	-0.306958	-0.220608	1.02958
13	shaded	-0.350572	-0.434091	-0.562589	0.621299	-0.356786	-0.530497	-0.640584	1.95337	-0.6142	1.44734	0.249307	-0.447163	-0.564659	0.780595	-0.87563	0.361854	1.85599	-0.522783	0.763826	0.420578	1.96725	-0.640584	-0.381732	3.36205	0.0266301	-0.88257	0.1841	0.960143	0.292788	0.856992	0.71744	1.08989	0.853804	0.830392	1.29411	0.979075	0.504403	-0.728765	-0.465978	0.163149	0.631423	0.936501	0.54102	1.45264	1.88049	-0.306958	-0.220608	1.02958
14	shaded	-0.547519	-0.446834	1.26186	-0.935071	-0.412924	1.20862	0.465075	0.235464	1.7357	-0.620255	-0.814732	-0.583789	-0.565973	0.500806	-0.450206	-0.950283	0.971254	-0.782591	1.33374	1.00077	0.832959	-0.637822	-0.36817	-0.384899	0.589108	0.728021	0.492289	1.46564	0.261001	2.965	0.474122	0.752912	0.844322	0.540734	0.825666	1.30447	-0.61079	-0.225725	-0.287393	1.09929	0.539858	0.980306	-0.48525	0.0126862	1.02889	0.632117	2.57982	0.858395
14	shaded	-0.547412	-0.446695	-0.563562	0.653892	-0.412821	-0.532026	1.64404	-0.135536	-0.614596	-0.156256	-0.714231	-0.559468	-0.329563	0.532132	-0.845511	-0.950283	0.971254	-0.782591	1.33374	1.00077	0.832959	-0.637822	-0.36817	-0.384899	0.589108	0.728021	0.492289	1.46564	0.261001	2.965	0.474122	0.752912	0.844322	0.540734	0.825666	1.30447	-0.61079	-0.225725	-0.287393	1.09929	0.539858	0.980306	-0.48525	0.0126862	1.02889	0.632117	2.57982	0.858395
15	shaded	-0.547662	-0.44683	4.28331	-0.935301	-0.412903	-0.532232	-0.830005	0.747646	-0.614504	-0.620256	-0.812871	0.78727	-0.565963	0.952264	-0.87706	-0.135372	1.62824	0.063584	0.46372	0.332702	1.54623	-0.700241	-0.349222	-0.417717	0.355364	0.247489	0.789606	0.0597051	-0.319334	0.693829	1.11344	0.779225	0.143746	-0.132374	0.349368	0.301633	-0.243406	0.292822	-0.385934	-0.398213	1.09809	0.6901	0.787298	-1.13989	0.657486	0.883109	1.2219	0.468134
15	shaded	-0.546856	-0.446513	0.249701	1.18441	-0.40835	-0.53201	0.349541	-1.05357	-0.614229	-0.619649	1.41302	-0.576833	0.0653941	-0.758789	-0.515498	-0.135372	1.62824	0.063584	0.46372	0.332702	1.54623	-0.700241	-0.349222	-0.417717	0.355364	0.247489	0.789606	0.0597051	-0.319334	0.693829	1.11344	0.779225	0.143746	-0.132374	0.349368	0.301633	-0.243406	0.292822	-0.385934	-0.398213	1.09809	0.6901	0.787298	-1.13989	0.657486	0.883109	1.2219	0.468134
[truncated: 50 more columns]
