# Supplementary material for: Probing the Metabolic Landscape of Plant Vascular Bundles by Infrared Fingerprint Analysis, Imaging and Mass Spectrometry
Source: Biomolecules. 2021 Nov 18;11(11):1717. doi: 10.3390/biom11111717 (PMC8615794; doi:10.3390/biom11111717)
Supplement: Supplementary file 1 [file biomolecules-11-01717-s001.zip › SupplTableS3.xlsx]

## Sheet: Suppl.Tbl. 3
Suppl. Table 3. Overview of MS feature association to sap clusters according to hca1. The table lists associated compounds identified by MS in sap samples along with the relative absorbance of associated IR features extracted by PCA from ATR spectra of the same samples.
cluster1	cluster2	cluster3	cluster4	cluster5	cluster6	cluster7	cluster8
coalligned Sap IR absorbance [abs/abs]
0	0	0.02717	0.4715	0.2338	0.05179	0.0834	0.1324
coalligned IC-MS components
2-Aminoadipate	IAA	Allantoin	NADH	Azelaic acid	AMP	2-Ureido-Gly	2-Oxoglutarate
2-Furoic acid	2,5-Dihydroxybenzoate 2-O-?-D-glucoside	Isocitrate			Dihydroxyacetone-P	3-P-glycerate	Ascorbate
2-Oxoglutaramate	Aesculin	Mevalonic acid-5P			Fructose 1,6-PP	4-Oxoproline	Fumarate
3-Deoxy-D-glycero-D-galacto-non-2-ulopyranosonate	cis-Aconitate	Oxaloacetate			GMP	6-P-gluconate	Galactose 6-P
Citrate	Cysteic acid				NADPH	Allantoate	Lactate
Galactose 1-P	Fructose 6-P				PEP	D-myo-Inositol 1,4-bisphosphate	Malate
Glycerol 3-P	Galacturonate				UDP-Glucose	Erythrose 4-P	Pyruvate
Glyoxylate	Gluconate				UDP-NAc-glucosamine	Glucose 1,6-PP	Succinate
Malonate	Glucose 6-P				UMP	N-Acetyl-?-neuraminate	Trehalose 6-P
Mannose 6-P	Glycerate					NAc-Gly
Mannose/Glucose 1-P	Sedoheptulose 7-P					NAc-Ser
Mesaconate	Shikimate					Phosphate
Mevalonate	Sinapinic acid					Pyrophosphate
NAc-glucosamine 1-P	Sucrose 6-P					Sulfurate
Oxalate	trans-Aconitate					Taurine
Pantothenate
Pyridoxal 5-P
Quinic acid
Ribonate
Tartronate
Threonate
Uric acid
