# Supplementary material for: Probing the Metabolic Landscape of Plant Vascular Bundles by Infrared Fingerprint Analysis, Imaging and Mass Spectrometry
Source: Biomolecules. 2021 Nov 18;11(11):1717. doi: 10.3390/biom11111717 (PMC8615794; doi:10.3390/biom11111717)
Supplement: Supplementary file 1 [file biomolecules-11-01717-s001.zip › SupplTableS4.xlsx]

## Sheet: Supp.Tab S4
Supplementary Table S4. Untargeted metabolite analysis				Notes: 1 – Data are median values of 5 biological replicates 2 – P-value calculated by ANOVA and Tukey HSC post-hoc 3 – Adjusted P-value calculated using Benjamini-Hochberg correction; “NA” – not applicable due to manual annotation
Compound Name	Formula	Molecular Weight	RT [min]	Normalized Area [Arbitrary Units]																Group Area 1		Group CV [%]		Log2 Fold Change:	P-value: 2	Adj. P-value: 3
				Ctrl								Shade
				1	2	3	4	5	6	7	8	1	2	3	4	5	6	7	8	Ctrl	Shade	Ctrl	Shade	Shade/Ctrl	Shade/Ctrl	Shade/Ctrl
2,5-Dihydroxybenzoate 2-O-beta-D-glucoside	C13 H16 O9	316.08	17.012	1.04127e+07	6.41601e+06	952278	1.06318e+06	3.33726e+06	1.88405e+06	1.23439e+07	7.28889e+06	1.1608e+07	5.70602e+06	4.60939e+06	5.12002e+06	6.13535e+06	6.01893e+06	3.89335e+06	58094.5	4.87664e+06	5.41302e+06	79.8363	59.0742	0.15	0.84827	0.998413
2-Aminoadipate	C6 H11 N O4	161.069	2.634	4.34488e+06	2.7411e+06	2.01834e+06	2.5232e+06	4.28699e+06	2.06071e+06	4.69032e+06	5.64035e+06	4.21037e+06	5.13975e+06	5.21164e+06	4.50053e+06	5.97471e+06	5.38645e+06	5.43238e+06	40774.8	3.51405e+06	5.17569e+06	38.6876	41.8744	0.56	0.790616	0.998413
2-Furoic acid	C5 H4 O3	112.016	16.914	3.16188e+08	2.48165e+08	1.03915e+08	1.13238e+08	2.37256e+08	6.22903e+07	3.54523e+08	4.51131e+08	3.90546e+08	3.94179e+08	4.01548e+08	2.96642e+08	4.64912e+08	4.54764e+08	3.52299e+08	866384	2.4271e+08	3.92362e+08	57.6953	43.1892	0.69	0.926389	0.998413
2-Oxoglutaramate	C5 H7 N O4	145.038	3.181	1.10731e+07	9.00533e+06	4.85826e+06	6.19006e+06	9.00846e+06	3.79087e+06	1.38545e+07	1.38567e+07	8.28702e+06	1.0629e+07	1.1973e+07	9.22906e+06	1.33855e+07	1.35725e+07	1.23335e+07	262478	9.0069e+06	1.1301e+07	42.966	43.6519	0.33	0.766015	0.998413
2-Oxoglutarate	C5 H6 O5	146.022	13.096	7.96799e+09	7.14495e+09	1.29293e+10	8.87549e+09	1.06598e+10	2.0491e+09	7.76651e+09	1.09746e+10	2.94284e+09	4.80015e+09	1.53177e+09	1.79057e+09	1.44173e+09	2.05999e+09	6.9115e+08	849335	8.42174e+09	1.66117e+09	38.2515	76.6166	-2.34	0.0469214	0.628399
2-Ureido-Gly	C3 H7 N3 O3	133.049	2.783	729047	591037	203919	307648	469042	342753	1.17381e+06	1.03446e+06	1.65433e+06	2.28891e+06	6.238e+06	6.31946e+06	1.00559e+07	6.88668e+06	9.24007e+06	21213.4	530039	6.27873e+06	57.7986	68.2056	3.57	0.0648237	0.69489
3-Deoxy-D-glycero-D-galacto-non-2-ulopyranosonate	C9 H16 O9	268.079	2.723	4.16148e+06	3.13389e+06	946732	1.48517e+06	2.10097e+06	1.3449e+06	4.47368e+06	7.62055e+06	4.82756e+06	5.2423e+06	5.96829e+06	4.61602e+06	6.56644e+06	7.82531e+06	4.32402e+06	75556.1	2.61743e+06	5.03493e+06	70.5393	46.1707	0.94	0.700094	0.998413
3-P-glycerate	C3 H7 O7 P	185.993	16.67	5.33203e+07	6.35524e+07	4.92291e+07	2.52618e+07	3.1256e+07	6.12155e+06	1.95714e+07	5.64811e+07	5.12436e+07	6.60732e+07	5.57202e+07	8.4815e+07	7.48813e+07	9.21321e+07	9.09043e+07	98705.1	4.02426e+07	7.04772e+07	53.5965	46.8327	0.81	0.988285	0.998413
4-Oxoproline	C5 H7 N O3	129.043	2.749	6.55451e+07	5.26493e+07	7.95271e+07	1.16064e+08	8.99591e+07	4.51228e+07	6.87826e+07	7.68058e+07	8.14794e+07	9.6331e+07	1.25639e+07	2.27844e+08	1.20596e+08	1.10545e+08	1.66792e+08	3.47519e+06	7.27942e+07	1.03438e+08	29.8775	72.4904	0.51	0.751174	0.998413
6-P-gluconate	C6 H13 O10 P	276.025	16.38	1.12862e+07	1.31008e+07	5.93022e+06	2.96785e+06	4.79221e+06	694650	2.82307e+06	5.48907e+06	6.81313e+06	7.91265e+06	5.43705e+06	4.82173e+06	4.813e+06	1.6265e+07	1.07119e+07	79006.3	5.14064e+06	6.12509e+06	72.4908	67.3293	0.25	0.947709	0.998413
Aesculin	C15 H16 O9	340.079	22.433	1.05143e+08	1.38182e+08	4.19057e+07	5.67956e+07	7.77707e+07	2.22134e+07	1.31284e+08	1.75389e+08	1.08786e+08	1.62046e+08	1.22939e+08	1.02157e+08	1.29058e+08	7.80926e+07	1.5966e+08	282430	9.14567e+07	1.15862e+08	56.5474	48.0248	0.34	0.692977	0.998413
Allantoate	C4 H8 N4 O4	176.055	2.784	2.8978e+06	1.98404e+06	762069	1.21264e+06	1.85874e+06	1.26955e+06	3.15419e+06	4.36893e+06	5.80187e+06	8.20158e+06	2.45365e+07	2.28016e+07	3.85802e+07	2.35175e+07	3.29893e+07	35093.5	1.92139e+06	2.31595e+07	55.0818	69.4792	3.59	0.114148	0.838739
Allantoin	C4 H6 N4 O3	158.044	3.321	2.96669e+06	627935	561545	833021	1.38255e+06	878341	8.6345e+06	1.08549e+06	1.238e+06	1.21023e+06	2.33553e+06	2.09051e+06	3.15312e+06	4.42295e+06	2.96079e+06	45177.8	981918	2.21302e+06	129.254	62.4657	1.17	0.948761	0.998413
AMP	C10 H14 N5 O7 P	347.063	15.45	3.7676e+06	5.24892e+06	890012	445710	602446	1.59669e+06	1.22598e+06	4.02458e+06	5.52016e+06	1.06618e+07	2.73621e+06	1.8988e+06	302477	4.89708e+06	3.52624e+06	46004.4	1.41134e+06	3.13122e+06	82.7513	92.7135	1.15	0.907692	0.998413
Ascorbate	C6 H8 O6	176.032	11.244	1.44683e+07	9.77371e+06	2.40533e+07	1.06368e+07	1.23879e+07	2.4712e+06	1.11275e+07	1.13163e+07	5.02937e+06	9.41549e+06	3.88546e+06	9.9993e+06	5.2945e+06	5.22842e+06	1.7071e+06	74972.7	1.12219e+07	5.1289e+06	49.7153	66.9381	1.24385	0.0162892	NA
Azelaic acid	C9 H16 O4	188.105	16.052	2.6212e+06	2.27116e+06	3.04511e+06	2.67245e+06	2.52746e+06	3.18393e+06	4.64532e+06	2.8743e+06	3.75063e+06	2.70043e+06	1.60893e+06	2.4475e+06	3.18437e+06	2.03683e+06	2.41487e+06	153634	2.77337e+06	2.43118e+06	24.5958	47.4204	-0.19	0.214715	0.93381
cis-Aconitate	C6 H6 O6	174.016	17.203	1.77423e+08	1.30721e+08	4.35216e+07	6.79511e+07	8.38473e+07	3.8784e+07	1.39324e+08	1.7891e+08	2.33681e+08	1.91865e+08	1.28774e+08	9.70977e+07	1.32327e+08	1.6919e+08	1.37266e+08	211973	1.07284e+08	1.34796e+08	52.6853	50.9677	0.33	0.700491	0.998413
Citrate	C6 H8 O7	192.027	16.909	1.77322e+10	1.4236e+10	6.08452e+09	6.00285e+09	1.21181e+10	3.5846e+09	1.90058e+10	2.14753e+10	1.96315e+10	2.05236e+10	1.87246e+10	1.64704e+10	2.38862e+10	2.41827e+10	1.85872e+10	5.60203e+06	1.3177e+10	1.91781e+10	53.6449	43.0297	0.54	0.723335	0.998413
Cysteic acid	C3 H7 N O5 S	169.005	11.774	4.27561e+06	4.09762e+06	2.38417e+06	2.62831e+06	5.36747e+06	1.13607e+06	6.18876e+06	5.90878e+06	4.91516e+06	5.09768e+06	3.89484e+06	4.37848e+06	5.46334e+06	4.93677e+06	3.71312e+06	46557.3	4.18662e+06	4.64682e+06	45.4178	42.6071	0.15	0.62052	0.998413
Dihydroxyacetone-P	C3 H7 O6 P	169.998	17.558	5.96625e+06	7.12635e+06	7.66705e+06	3.49607e+06	2.22441e+06	630191	1.73711e+06	6.25128e+06	2.32791e+06	8.27677e+06	5.24338e+06	4.8615e+06	5.97906e+06	7.63917e+06	8.44056e+06	125122	4.73116e+06	5.61122e+06	61.4251	54.8016	0.25	0.948239	0.998413
D-myo-Inositol 1,4-bisphosphate	C6 H14 O12 P2	339.996	18.233	2.77108e+06	2.33603e+06	1.25617e+06	426608	776815	753214	646349	954315	1.6229e+06	1.76622e+06	1.90804e+06	1.85132e+06	3.55353e+06	7.55013e+06	3.24419e+06	116726	865565	1.87968e+06	68.7838	82.2944	1.12	0.28189	0.993007
Erythrose 4-P	C4 H9 O7 P	200.009	16.51	7.53333e+06	6.58495e+06	5.65088e+06	3.29623e+06	3.31226e+06	4.29184e+06	4.35001e+06	5.06203e+06	4.42829e+06	3.49885e+06	3.48286e+06	8.4931e+06	3.86636e+06	5.61331e+06	6.08023e+06	134648	4.70602e+06	4.14732e+06	30.2056	54.4958	-0.18	0.373367	0.998413
Fructose 1,6-PP	C6 H14 O12 P2	339.996	17.558	4.00939e+06	5.84752e+06	4.29922e+06	3.17712e+06	2.54593e+06	521292	1.75105e+06	7.39029e+06	2.78632e+06	9.20072e+06	5.33945e+06	3.11815e+06	7.56647e+06	6.07095e+06	7.45798e+06	69601.6	3.59326e+06	5.7052e+06	59.8505	58.1182	-0.49416	0.184123	NA
Fructose 6-P	C6 H13 O9 P	260.03	13.899	1.08064e+08	1.09854e+08	3.88114e+07	5.64504e+07	7.5682e+07	3.14845e+07	1.07343e+08	2.28931e+08	1.32011e+08	1.30167e+08	1.06292e+08	1.12963e+08	1.04772e+08	1.04171e+08	8.81797e+07	132066	9.15125e+07	1.05532e+08	66.3086	42.9588	0.21	0.576576	0.998413
Fumarate	C4 H4 O4	116.011	14.327	1.53974e+09	1.12472e+09	1.03907e+09	9.84717e+08	1.69901e+09	3.34398e+08	1.50556e+09	2.72058e+09	6.63208e+08	1.09042e+09	7.33569e+08	8.29265e+08	9.06581e+08	9.45182e+08	7.12814e+08	199818	1.31514e+09	7.81417e+08	50.703	44.6554	-0.75	0.225101	0.94797
Galactose 1-P	C6 H13 O9 P	260.03	7.586	2.97058e+07	1.73826e+07	1.42734e+07	1.52684e+07	2.37447e+07	8.03947e+06	3.83172e+07	5.08686e+07	2.78748e+07	2.21416e+07	4.17604e+07	5.05556e+07	6.86752e+07	6.30466e+07	4.57708e+07	118673	2.05637e+07	4.37656e+07	57.7641	56.3705	1.09	0.961172	0.998413
Galactose 6-P	C6 H13 O9 P	260.03	12.029	6.55059e+06	4.82121e+06	3.60798e+06	3.05263e+06	3.58163e+06	1.51569e+06	6.53498e+06	1.15464e+07	1.43626e+06	3.36059e+06	3.05638e+06	6.69302e+06	2.42768e+06	2.93684e+06	2.65589e+06	93895.5	4.2146e+06	2.79637e+06	60.2121	66.568	-0.59	0.127659	0.84839
Galacturonate	C6 H10 O7	194.043	4.574	1.16463e+08	1.14777e+08	6.44049e+07	8.92325e+07	1.19602e+08	5.54954e+07	1.4343e+08	1.40835e+08	9.03189e+07	7.91552e+07	1.00163e+08	7.81206e+07	8.40235e+07	9.32083e+07	7.98982e+07	155160	1.1562e+08	8.19608e+07	31.1129	41.6038	-0.5	0.275166	0.988834
Gluconate	C6 H12 O7	196.058	2.841	1.37184e+08	1.13942e+08	4.04969e+07	5.30085e+07	9.07335e+07	3.0597e+07	4.54274e+07	2.51229e+08	8.85006e+07	1.29936e+08	1.2593e+08	1.02105e+08	1.20795e+08	1.53046e+08	1.04766e+08	120804	7.1871e+07	1.12781e+08	77.1908	44.6836	0.65	0.645659	0.998413
Glucose 1,6-PP	C6 H14 O12 P2	339.996	17.274	3.90932e+07	3.44204e+07	2.09021e+07	7.18026e+06	1.26228e+07	2.36976e+06	9.05102e+06	1.28425e+07	2.75146e+07	3.05087e+07	2.682e+07	2.55769e+07	5.15974e+07	9.82922e+07	7.30322e+07	279223	1.27326e+07	2.90117e+07	76.1446	74.7702	1.19	0.461417	0.998413
Glucose 6-P	C6 H13 O9 P	260.03	13.238	8.58073e+08	7.55162e+08	3.45468e+08	3.5165e+08	5.57383e+08	1.38792e+08	7.55226e+08	1.7826e+09	5.7845e+08	7.58437e+08	7.23895e+08	8.39836e+08	5.78292e+08	7.40953e+08	4.6555e+08	205475	6.56273e+08	6.51172e+08	72.8642	45.4009	0.242779	0.349814	NA
Glycerate	C3 H6 O4	106.027	2.858	1.00731e+09	7.67212e+08	2.70976e+08	2.28493e+08	5.11147e+08	1.32868e+08	1.39142e+09	1.60474e+09	6.13878e+08	7.49192e+08	7.77164e+08	7.15777e+08	7.44111e+08	9.57276e+08	5.47062e+08	1.27288e+06	6.39179e+08	7.29944e+08	74.9127	44.5249	0.19	0.569144	0.998413
Glycerol 3-P	C3 H9 O6 P	172.014	7.859	1.04023e+08	9.19049e+07	4.80605e+07	6.99683e+07	1.00494e+08	4.35742e+07	2.01965e+08	2.51293e+08	1.18754e+08	1.26016e+08	2.11699e+08	1.73229e+08	2.87452e+08	2.2169e+08	1.78288e+08	106559	9.61994e+07	1.75758e+08	65.1934	52.0835	0.87	0.765328	0.998413
Glyoxylate	C2 H2 O3	74.0002	4.847	7.64038e+07	1.016e+08	3.63046e+07	4.03453e+07	5.71262e+07	3.82717e+07	9.41665e+07	1.29804e+08	8.06358e+07	1.03503e+08	1.32105e+08	6.52823e+07	1.3147e+08	1.46772e+08	1.05301e+08	1.18282e+07	6.6765e+07	1.04402e+08	48.1711	45.2832	0.64	0.533062	0.998413
GMP	C10 H14 N5 O8 P	363.058	18.148	834227	6.6872e+06	820208	930980	1.00659e+06	481013	936387	678497	6.69489e+06	1.02221e+07	475631	1.55045e+06	851690	890583	944921	295798	882604	917752	134.703	133.951	0.06	0.620777	0.998413
IAA	C10 H9 N O2	175.063	21.411	312630	812062	256711	285616	475163	472747	619475	1.6791e+06	617206	982530	429494	673092	370831	271776	594390	206444	473955	511942	76.3489	48.5281	0.11	0.765387	0.998413
Isocitrate	C6 H8 O7	192.027	17.078	2.3273e+08	1.28798e+10	1.1858e+08	1.06901e+08	2.66467e+08	5.95463e+07	1.51105e+10	6.44168e+08	4.75977e+08	6.39605e+08	1.66752e+10	1.4747e+10	6.75271e+08	8.98111e+08	2.09619e+07	201946	2.49598e+08	6.57438e+08	174.004	166.161	-0.214404	0.442514	NA
Lactate	C3 H6 O3	90.0318	2.877	1.11622e+08	1.03666e+08	3.01195e+08	1.35881e+08	1.19687e+08	8.23443e+07	1.60607e+08	1.46454e+08	9.84366e+07	9.98727e+07	1.27568e+08	1.54286e+08	1.48031e+08	1.66134e+08	1.04819e+08	6.14064e+06	1.27784e+08	1.16194e+08	46.654	44.6085	-0.14	0.302013	0.996149
Levulinate	C5 H8 O3	116.047	2.92	3.80215e+06	4.40655e+06	5.33841e+06	5.06274e+06	3.82123e+06	4.77823e+06	5.22984e+06	6.7859e+06	8.30073e+06	3.61177e+06	3.96965e+06	9.47377e+06	8.52294e+06	5.53344e+06	3.14056e+06	2.68724e+06	4.92048e+06	4.75154e+06	19.6704	48.182	-0.05	0.783619	0.998413
Malate	C4 H6 O5	134.022	10.16	2.68395e+10	2.43178e+10	3.57994e+10	2.32281e+10	2.84631e+10	8.814e+09	2.75942e+10	3.84051e+10	1.66169e+10	2.06033e+10	1.08628e+10	1.25858e+10	1.11295e+10	1.58576e+10	9.83431e+09	6.33476e+06	2.72168e+10	1.18576e+10	33.562	50.0912	-1.2	0.149673	0.867058
Malonate	C3 H4 O4	104.011	11.064	1.49354e+08	1.0121e+08	5.0931e+07	5.71926e+07	8.57262e+07	4.69122e+07	1.40614e+08	1.84876e+08	1.18692e+08	1.45694e+08	1.51858e+08	1.10761e+08	1.63857e+08	1.92762e+08	1.13985e+08	2.22924e+06	9.3468e+07	1.32193e+08	50.3743	45.5519	0.5	0.881729	0.998413
Mannose 6-P	C6 H13 O9 P	260.03	14.421	3.29054e+07	2.43982e+07	1.30129e+07	1.56873e+07	2.15926e+07	6.90316e+06	3.08202e+07	5.98936e+07	2.72337e+07	3.54877e+07	4.04748e+07	5.21419e+07	4.77477e+07	5.5944e+07	4.22028e+07	59308.5	2.29954e+07	4.13388e+07	63.8945	47.0892	-0.554037	0.172565	NA
Mannose/Glucose 1-P	C6 H13 O9 P	260.03	7.933	2.91588e+07	2.97952e+07	1.79057e+07	2.13001e+07	3.23677e+07	1.06891e+07	3.34264e+07	7.56611e+07	3.04869e+07	4.27752e+07	5.57427e+07	4.7828e+07	5.6803e+07	5.94151e+07	4.61016e+07	124921	2.9477e+07	4.69648e+07	62.5914	45.8559	0.67	0.819629	0.998413
Mesaconate	C5 H6 O4	130.027	16.91	3.44147e+08	2.75455e+08	1.13525e+08	1.22995e+08	2.60113e+08	6.868e+07	3.89826e+08	4.95542e+08	4.33743e+08	4.33187e+08	4.39921e+08	3.25298e+08	5.09685e+08	4.92714e+08	3.88248e+08	1.8825e+06	2.67784e+08	4.33465e+08	57.7734	42.9787	0.69	0.989634	0.998413
Mevalonate	C6 H12 O4	148.074	2.799	1.18156e+07	1.19591e+07	6.2822e+06	8.56873e+06	1.01362e+07	6.62387e+06	1.73887e+07	1.50647e+07	1.14281e+07	1.27249e+07	1.5553e+07	1.50424e+07	1.70465e+07	1.82579e+07	1.74016e+07	76243.4	1.09759e+07	1.52977e+07	35.6053	43.7523	0.48	0.688684	0.998413
Mevalonate 5-P	C6 H13 O7 P	228.04	5.526	1.2334e+06	1.34109e+06	931099	1.08671e+06	1.66657e+06	1.02541e+06	1.75709e+06	1.21602e+06	1.07956e+06	1.23445e+06	2.00334e+06	1.49911e+06	1.36396e+06	1.50515e+06	1.64136e+06	98387	1.22471e+06	1.43154e+06	23.0407	42.9579	0.23	0.602423	0.998413
N-Acetyl-beta-neuraminate	C11 H19 N O9	309.106	2.748	1.40514e+06	1.78596e+06	3.1051e+06	3.1041e+06	2.97146e+06	558888	2.10725e+06	2.24941e+06	1.79086e+06	2.24628e+06	1.20185e+06	3.54511e+06	1.25412e+06	1.75311e+06	2.26749e+06	20474.7	2.17833e+06	1.77198e+06	41.8581	57.9265	-0.3	0.364911	0.998413
NAc-glucosamine 1-P	C8 H16 N O9 P	301.056	6.855	7.00975e+06	4.37118e+06	2.67588e+06	3.44011e+06	5.45535e+06	2.20226e+06	1.1003e+07	9.94372e+06	5.25491e+06	6.0522e+06	7.34354e+06	6.9349e+06	9.60372e+06	1.06957e+07	7.33036e+06	86888.4	4.91326e+06	7.13263e+06	57.2266	47.9656	0.54	0.799759	0.998413
NAc-Gly	C4 H7 N O3	117.043	2.697	4.13167e+06	3.05778e+06	4.75988e+06	4.24375e+06	4.29381e+06	2.23792e+06	4.70696e+06	5.20656e+06	4.21908e+06	5.72404e+06	5.60774e+06	9.51056e+06	6.46545e+06	6.27311e+06	7.44573e+06	830135	4.26878e+06	5.99858e+06	23.8686	43.714	0.49	0.47824	0.998413
NAc-Ser	C5 H9 N O4	147.053	2.692	1.13537e+08	8.79087e+07	1.54831e+08	1.63007e+08	1.52871e+08	6.97111e+07	1.20166e+08	1.38971e+08	1.46565e+08	1.88359e+08	1.6936e+08	3.64018e+08	2.06324e+08	1.84563e+08	2.33044e+08	226405	1.29568e+08	1.86461e+08	26.8377	53.857	0.53	0.720015	0.998413
NADH	C21 H29 N7 O14 P2	665.125	17.273	1.1588e+06	919335	878574	1.87736e+06	903084	1.22665e+06	1.14511e+06	1.14888e+06	809041	802563	1.38402e+06	2.18609e+06	811521	1.3949e+06	1.20346e+06	1.55785e+06	1.14699e+06	1.29374e+06	27.7614	37.6403	-0.132662	0.157651	NA
NADPH	C21 H30 N7 O17 P3	745.091	18.512	609925	1.12562e+06	155363	74280.6	51450.5	75977.5	132703	632143	901879	1.09139e+06	544375	787025	536862	86618.5	366245	160812	144033	540619	109.648	63.1139	1.91	0.164518	0.871885
Oxalate	C2 H2 O4	89.9954	13.963	1.21121e+09	6.72732e+08	4.16134e+08	5.6784e+08	6.91064e+08	3.82101e+08	1.31494e+09	1.35625e+09	9.99567e+08	9.8692e+08	1.26893e+09	8.5405e+08	1.08751e+09	1.50164e+09	1.03601e+09	233525	6.81898e+08	1.01779e+09	48.8677	45.339	0.58	0.550318	0.998413
Oxaloacetate	C4 H4 O5	132.006	16.168	2.12069e+06	1.00575e+06	853592	1.15365e+06	1.63567e+06	479744	3.29879e+06	2.39259e+06	1.60977e+06	1.66835e+06	2.72887e+06	1.604e+06	1.70132e+06	2.17294e+06	1.97695e+06	208007	1.39466e+06	1.68484e+06	57.9394	41.9838	0.27	0.913806	0.998413
Pantothenate	C9 H17 N O5	219.111	2.925	6.21302e+06	3.63678e+06	2.04599e+06	1.78085e+06	3.47228e+06	1.50407e+06	7.27562e+06	8.24853e+06	9.31159e+06	1.02487e+07	8.57969e+06	8.87944e+06	9.34313e+06	9.30939e+06	6.81606e+06	31103.3	3.55453e+06	9.09441e+06	61.5929	42.1733	1.36	0.788896	0.998413
PEP	C3 H5 O6 P	167.982	17.202	9.02747e+06	7.16924e+06	2.54063e+06	2.50294e+06	2.74755e+06	550286	2.26781e+06	9.7792e+06	9.68533e+06	1.37735e+07	7.26249e+06	1.42375e+07	1.40113e+07	1.15868e+07	9.12177e+06	40633.8	2.64409e+06	1.06361e+07	77.0592	47.729	2.01	0.527283	0.998413
Phosphate	H3 O4 P	97.9769	16.499	1.88079e+10	2.04498e+10	6.57686e+09	2.06991e+10	1.9074e+10	1.0223e+10	2.07665e+10	2.22544e+10	2.28434e+10	2.44894e+10	5.32102e+09	3.58256e+10	2.82132e+10	2.91393e+10	2.90374e+10	1.19291e+07	1.97619e+10	2.63513e+10	32.9182	57.3099	0.42	0.537765	0.998413
Pyridoxal 5-P	C8 H10 N O6 P	247.025	18.121	1.82845e+06	1.42706e+06	518194	603751	981918	309632	1.18198e+06	2.15237e+06	944652	1.83784e+06	1.14156e+06	1.49335e+06	1.67115e+06	2.03716e+06	1.47841e+06	77153.3	1.08195e+06	1.48588e+06	57.8785	46.3127	0.46	0.869772	0.998413
Pyrophosphate	H4 O7 P2	177.943	16.495	2.29485e+08	2.04348e+08	2.69299e+08	2.31334e+08	2.34898e+08	1.01532e+08	2.45297e+08	2.77097e+08	3.2247e+08	3.30385e+08	2.92869e+08	4.26237e+08	3.39459e+08	4.01401e+08	3.33267e+08	77145.6	2.33116e+08	3.31826e+08	24.383	42.8285	0.51	0.601736	0.998413
Pyruvate	C3 H4 O3	88.0161	3.751	1.09718e+09	9.73084e+08	1.43855e+09	1.05231e+09	1.366e+09	3.97566e+08	1.24905e+09	1.43519e+09	7.34904e+08	1.00684e+09	8.59384e+08	9.92183e+08	9.93243e+08	8.97403e+08	6.69539e+08	1.16095e+06	1.17312e+09	8.78394e+08	30.5093	43.4437	-0.42	0.261405	0.975959
Quinic acid	C7 H12 O6	192.063	2.696	1.63912e+08	9.65653e+07	4.20371e+07	7.11799e+07	1.03802e+08	7.50953e+07	1.50351e+08	2.08966e+08	1.00232e+08	1.57866e+08	1.47862e+08	1.42205e+08	1.74837e+08	2.48242e+08	1.53092e+08	106973	1.00184e+08	1.50477e+08	48.9179	50.0461	0.59	0.616896	0.998413
Ribonate	C5 H10 O6	166.048	2.87	1.58339e+08	1.30796e+08	4.55347e+07	6.14354e+07	9.86307e+07	4.32276e+07	1.92297e+08	2.62881e+08	1.40493e+08	1.84554e+08	1.89472e+08	1.4484e+08	1.88239e+08	1.92617e+08	1.45304e+08	74799.7	1.14714e+08	1.64929e+08	62.7043	43.1468	0.52	0.646355	0.998413
Sedoheptulose 7-P	C7 H15 O10 P	290.04	15.571	1.97483e+07	1.62362e+07	6.42428e+06	7.24555e+06	1.49358e+07	3.72473e+06	1.66851e+07	3.73894e+07	1.41593e+07	1.44413e+07	1.54834e+07	1.65954e+07	1.58673e+07	1.52475e+07	1.26913e+07	50455	1.5586e+07	1.48444e+07	69.3653	41.2666	-0.07	0.510727	0.998413
Shikimate	C7 H10 O5	174.053	2.988	3.18176e+07	2.3853e+07	1.10462e+07	1.4683e+07	2.48408e+07	7.62594e+06	3.0361e+07	5.0609e+07	2.29348e+07	2.44045e+07	2.3661e+07	1.26214e+07	1.94113e+07	2.49201e+07	1.54102e+07	122503	2.43469e+07	2.1173e+07	56.6412	47.2392	-0.2	0.342126	0.998413
Sinapinic acid	C11 H12 O5	224.069	22.43	1.2832e+07	1.50775e+07	5.1069e+06	6.50509e+06	1.26785e+07	3.5574e+06	1.96536e+07	2.98987e+07	1.93342e+07	2.18959e+07	1.93341e+07	1.39465e+07	1.91261e+07	1.04506e+07	2.12079e+07	103959	1.27552e+07	1.92301e+07	65.9589	47.0501	0.59	0.831001	0.998413
Succinate	C4 H6 O4	118.027	10.048	6.48869e+08	4.98147e+08	3.34658e+09	6.74913e+08	7.68028e+08	6.09265e+08	5.13148e+08	1.52279e+09	3.5882e+08	3.67755e+08	3.10964e+08	3.36854e+08	3.14138e+08	2.79392e+08	3.06551e+08	9.28823e+06	6.61891e+08	3.12551e+08	90.9412	40.3813	-1.08	0.0178011	0.436236
Sucrose 6-P	C12 H23 O14 P	422.083	9.912	732583	316626	395769	365899	338500	362439	349167	1.46953e+06	359338	329493	379276	330593	364920	362661	337502	32827	364169	348420	73.5853	36.6101	0.794567	0.120036	NA
Sulfate	H2 O4 S	97.9674	12.615	2.12815e+10	2.29907e+10	2.69775e+10	2.46936e+10	2.6669e+10	9.30794e+09	2.26383e+10	2.19166e+10	2.21561e+10	2.65846e+10	2.58477e+10	2.95958e+10	2.96223e+10	3.12625e+10	2.89224e+10	2.01962e+07	2.28145e+10	2.77535e+10	25.2284	42.0488	0.28	0.505654	0.998413
Tartronate	C3 H4 O5	120.006	12.42	2.64253e+08	1.96525e+08	9.67522e+07	1.30212e+08	1.82496e+08	1.2099e+08	3.08262e+08	3.61302e+08	2.67376e+08	2.90533e+08	3.72294e+08	2.73164e+08	3.45026e+08	3.54724e+08	2.84697e+08	527438	1.8951e+08	2.87615e+08	45.8777	42.9098	0.6	0.722427	0.998413
Taurine	C2 H7 N O3 S	125.015	2.979	150768	35411.7	830914	585638	41748.8	55963.7	181696	182423	159585	95317.1	49556.4	51748	3.61023e+06	80515.9	49600.6	27779.5	166232	66131.9	113.042	242.678	-1.33	0.64506	0.998413
Threonate	C4 H8 O5	136.037	2.852	8.28092e+08	7.13051e+08	2.47489e+08	3.68976e+08	5.7298e+08	2.62454e+08	1.18178e+09	1.49463e+09	7.71775e+08	9.33971e+08	1.11328e+09	7.36526e+08	1.07454e+09	1.26373e+09	8.98679e+08	162326	6.43015e+08	9.16325e+08	63.1377	45.4297	0.51	0.604396	0.998413
trans-Aconitate	C6 H6 O6	174.016	17.544	1.43182e+07	9.74973e+06	4.09973e+06	4.32894e+06	5.37507e+06	3.22837e+06	8.92608e+06	1.40797e+07	1.58292e+07	1.2291e+07	9.0549e+06	7.07016e+06	8.89876e+06	1.31192e+07	6.36799e+06	222285	7.15057e+06	8.97683e+06	55.6393	52.8356	0.33	0.82428	0.998413
Trehalose 6-P	C12 H23 O14 P	422.083	7.647	1.62608e+06	1.3886e+06	762555	733316	1.68598e+06	261502	2.03582e+06	2.36721e+06	250167	280766	145202	86806.7	105033	107161	59067.5	43535.8	1.50734e+06	106097	52.8623	64.4324	-3.83	1.07991e-05	0.0152808
UDP-Glucose	C15 H24 N2 O17 P2	566.055	17.38	197378	3.72815e+06	1.48533e+06	1.30054e+06	1.512e+06	264926	120822	272971	3.90446e+06	5.73025e+06	4.83964e+06	2.0712e+06	3.80384e+06	3.33101e+06	4.57335e+06	76413	786756	3.85415e+06	109.888	50.009	2.29	0.0608641	0.662482
UDP-NAc-glucosamine	C17 H27 N3 O17 P2	607.082	17.072	2.05295e+07	1.54694e+07	5.93254e+06	7.14364e+06	1.11988e+07	1.97426e+06	9.08565e+06	3.50694e+07	2.44006e+07	3.61543e+07	2.93531e+07	2.40989e+07	3.33185e+07	3.10957e+07	2.60282e+07	63750.1	1.01422e+07	2.76906e+07	79.0348	43.64	1.45	0.7218	0.998413
UMP	C9 H13 N2 O9 P	324.036	17.345	7.39408e+07	2.41203e+08	7.66909e+07	7.56052e+07	9.07881e+07	1.92732e+07	4.62858e+07	2.75697e+08	2.36673e+08	3.62964e+08	2.25543e+08	2.04307e+08	1.74759e+08	1.23994e+08	1.40624e+08	910864	7.61481e+07	1.89533e+08	82.9405	56.7258	1.32	0.799461	0.998413
Uric acid	C5 H4 N4 O3	168.028	17.55	2.08675e+07	1.00696e+07	5.51718e+06	1.67317e+07	1.31133e+07	1.07964e+07	2.36293e+07	2.07285e+07	1.15311e+07	2.12413e+07	1.80783e+07	1.7231e+07	3.36577e+07	2.63061e+07	2.30998e+07	117203	1.49225e+07	1.96598e+07	41.652	53.1263	0.4	0.722522	0.998413
